# Supplementary material for: Stability and Fitness Impact of the Visually Discernible Rosea1 Marker in the Tobacco etch virus Genome
Source: Viruses. 2013 Sep 9;5(9):2153–68. doi: 10.3390/v5092153 (PMC3798895; doi:10.3390/v5092153)
Supplement: Supplementary File 1 — Supplementary Materials (PDF, 33 KB) [file viruses-05-02153-s001.pdf]

## Supplementary material

**Supplemental Fig. 1.** Complete sequences of recombinant viral clones TEV-Ros1 and TEV-eGFP. Sequences corresponding to Ros1 and eGFP are highlighted on red and green backgrounds, respectively. Additional sequences fused to the Ros1 and eGFP cDNA 5' and 3' termini, corresponding to engineered NlaPro cleavage sites, are on yellow background. TEV cistron borders are underlined. TEV silent mutations G273A and A1119G are shown in red.

### >TEV-Ros1

```
GAAAAATAACAAATCTCAACACAACATATACAAAACAAACGAATCTCAAGCAATCAAGCATTCTACTTCTATTGCAGCAATTT
AAATCATTTCTTTTAAAGCAAAAGCAATTTTCTGAAAATTTTACCATTACGAACGATAGCCATGGCACTCATCTTTGGCA
CAGTCAACGCTAACATCCTGAAGGAAGTGTTCGGTGGAGCTCGTATGGCTTGCCTTACCAGCGCACATATGGCTGGAGCGAA
TGGAAGCATTTTGAAGAAGGCAGAAAGAACCTCTCGTGCAATCATGCACAAACCAGTGATCTTCGGAGAAGACTACATTACC
GAGGCAGACTTGCCTTACACACCACTCCATTTAGAGGTCGATGCTGAAATGGAGCGGATGTATTATCTTGGTCGTCGCGCGC
TCACCCATGGCAAGAGACGCAAGTTTCTGTGAATAACAAGAGGAACAGGAGAAGGAAAGTGGCCAAAACGTCACGTGGGGCG
TGATTCCATTGTTGAGAAGATTGTAGTGCCCCACACCGAGAGAAAAGGTTGATACCACAGCAGCAGTGGAAGACATTTGCAAT
GAAGCTACCACTCAACTTGTGCATAATAGTATGCCAAAGCGTAAGAAGCAGAAAAACTTCTTGCCCGCCACTTCACTAAGTA
ACGTGTATGCCCCAACTTGGAGCATAGTGCAGCAACGCCATATGCAGGTGGAGATCATTAGCAAGAAGAGCGTCCGAGCGAG
GGTCAAGAGATTTGAGGGCTCGGTGCAATTGTTTCGCAAGTGTGCGTCACATGTATGGCGAGAGGAAAAGGTGGACTTACGT
ATTGACAACCTGGCAGCAAGAGACACTTCTAGACCTTGCTAAAAGATTTAAGAATGAGAGAGTGGATCAATCGAAGCTCACTT
TTGGTTCAAGTGGCCTAGTTTTGAGGCAAGGCTCGTACGGACCTGCGCATTTGGTATCGACATGGTATGTTTATTGTACGCGG
TCGGTTCGATGGGATGTTGGTGGATGCTCGTGCGAAGGTAACGTTTCGCTGTTTGTCACTCAATGACACATTATAGCGACAAA
TCAATCTCTGAGGCATTTCTCATACCATACTCTAAGAAATTTCTTGGAGTTGAGGCCAGATGGAATCTCCCATGAGTGTACAA
GAGGAGTATCAGTTGAGCGGTGCGGTGAGGTGGCTGCAATCCTGACACAAGCACTTTCACCGTGTGGTAAGATCACATGCAA
ACGTTGCGATGGTTGAAACACCTGACATTTGTTGAGGGTGAGTCGGGAGACAGTGTACCAACCAAGGTAAGCTCCTAGCAATG
CTGAAAAGAACAGTATCCAGATTTCCCAATGGCCGAGAACTACTCACAAGGTTTTTGCAACAGAAATCACTAGTAAATACAA
ATTTGACAGCCTGCGTGAGCGTCAAAACAACCTCATTTGGTGACCGCAAACAAGCTCCATTCACACACGTACTGGCTGTCAGCGA
AATCTGTTTTAAAGGCAATAAACTAACAGGGGGCCGATCTCGAAGAGGCAAGCACACATATGCTTGAATAGCAAGGTTCTTG
AACAATCGCACTGAAAATATGCGCATTTGCCACCTTGGTTCTTTCAGAAATAAAATCTCATCGAAGGCCCATGTGAATAACG
CACTCATGTGTGATAATCAACTTGATCAGAATGGGAATTTTATTTGGGGACTAAGGGGTGCACACGCAAAAGAGGTTTCTTAA
AGGATTTTCTACTGAGATTGACCCAAATGAAGGATACGATAAGTATGTTATCAGGAAACATATCAGGGGTAGCAGAAAGGCTA
GCAATTTGGCAATTTGATAATGTCAACTGACTTCCAGACGCTCAGGCAACAATTCAGGCGAAACTATTGAGCGTAAAGAAA
TTGGGAATCACTGCATTTCAATGCGGAATGGTAATTACGTGTACCCATGTTGTTGTGTTACTCTTGAAGATGGTAAGGCTCA
ATATTCGGATCTAAAGCATCCAACGAAGAGACATCTGGTCATTTGGCAACTCTGGCGATTCAAAGTACCTAGACCTTCCAGTT
CTCAATGAAGAGAAAAATGTATATAGCTAATGAAGGTTATTGCTACATGAACATTTTCTTTGCTCTACTAGTGAATGTCAAGG
AAGAGGATGCAAAAGGACTTCACCAAGTTTATAAGGGACACAATTTGTTCCAAAGCTTGGAGCGTGGCCAACAATGCAAGATGT
TGCAACTGCATGCTACTTACTTTCCATTCTTTACCCAGATGTCCTGAGTGCTGAATTACCCAGAATTTTGGTTGATCATGAC
AACAAAACAATGCATGTTTTGGATTTCGTATGGGTCTAGAACGACAGGATACCACATGTTGAAAATGAACACAACATCCCAGC
TAATTGAATTCGTTCAATTCAGGTTTGGAAATCCGAAATGAAAACCTTACAATGTTGGAGGGATGAACCGAGATATGGTCACACA
AGGTGCAATTGAGATGTTGATCAAGTCCATATACAAACCACATCTCATGAAGCAGTTACTTGGAGGAGGCCATACATAATT
GTCCTGGCAATAGTCTCCCTTCAATTTTAATTGCCATGTACAACCTCTGGAACTTTTGAGCAGGCGTTACAAATGTGGTTGC
CAATACAAATGAGGTTAGCTAACCTCGCTGCCATCTTGTGAGCCTTGGCGCAAAAGTTAACTTTGGCAGACTTGTTTCGTCCA
GCAGCGTAATTTGATTAATGAGTATGCGCAGGTAATTTTGGACAATCTGATTGACGGTGTGAGGGTTAACCATTCGCTATCC
CTAGCAATGGAAATTGTTACTATTAAGCTGGCCACCCAAGAGATGGACATGGCGTTGAGGGAAGGTGGCTATGCTGTGACCT
CTGAAAAGGTGCATGAAATGTTGGAAAAAACTATGTAAAGGCTTTGAAGGATGCATGGGACGAATTAAGTTGGTTGGAAAA
ATTCTCCGCAATCAGGCATTCAGAAAAGCTCTTGAAATTTGGGCGAAAGCCTTTAATCATGAAAAACACCGTAGATTGCGGC
GGACATATAGACTTGTCTGTGAAATCGCTTTTCAAGTTCCACTTGGAACTCCTGAAGGGAACCATCTCAAGAGCCGTAATG
GTGGTGCAAGAAAGGTAAGAGTAGCGAAGAATGCCATGACAAAAGGGGTTTTTCTCAAATCTACAGCATGCTTCTCTGACGT
CTACAAGTTTATCAGTCTCGAGTGTCTTCTTCTTGTGTTGACATCTTATTTCAAATTTGACTGCATGATAAGGGCACAC
CGAGAGGCGAAGGTTGCTGCACAGTTGCGAGAAAGAGAGCGAGTGGGACAATATCATCAATAGAACTTTCCAGTATTCTAAGC
TTGAAAATCCTATTGGCTATCGCTCTACAGCGGAGGAAAGACTCCAATCAGAACACCCCGAGGCTTTTCAGTACTACAAGTT
TTGCATTGGAAAAGGAAGACCTCGTTGAACAGGCAAAACAACCGGAGATAGCATACTTTGAAAAGATTATAGCTTTTCATCACA
CTTGATTAATGGCTTTTGACGCTGAGCGGAGTGATGGAGTGTTCAAGATACTCAATAAGTTCAAAGGAATACTGAGCTCAA
CGGAGAGGGAGATCATCTACACGCAGAGTTTGGATGATTACGTTACAACCTTTGATGACAATATGACAATCAACCTCGAGTT
GAATATGGATGAACTCCACAAGACGAGCCTTCTGGAGTCACTTTTAAGCAATGGTGGAAACAACCAATCAGCCGAGGCAAC
GTGAAGCCACATTATAGAAGTGAAGGGCACTTCATGGAGTTTACCAGAGATACTGCGGCATCGGTTGCCAGCGAGATATCAC
ACTACCCGCAAGAGATTTTCTTGTGAGAGGTGCTGTTGGATCTGGAAAATCCACAGGACTTCCATACCATTTATCAAAGAG
AGGGAGAGTGTTAATGCTTGAGCTTACCAGACCACTCACAGATAACGTGCACAAGCAACTGAGAAGTGAACATTTAACTGC
TTCCCAACTTTGAGGATGAGAGGGAAGTCAACTTTTGGGTTCATCACCGATTACAGTCATGACTAGTGGATTTCGCTTTACACC
```

ATTTTGCACGAAACATAGCTGAGGTA AAAACATACGATTTTGTCTATAATTGATGAATGTCATGTGAATGATGCTTCTGCTAT  
AGCGTTTAGGAATCTACTGTTTGAACATGAATTTGAAGGAAAAGTCCCTCAAAGTGTGAGCCACACCACCAGGTAGAGAAGTT  
GAATTCACAACCTCAGTTTCCCGTGAAACTCAAGATAGAAGAGGCTCTTAGCTTTT CAGGAATTTGTAAAGTTTACAAGGGACAG  
GTGCCAACGCCGATGTGATTAGTTGTGGCGACAACATACTAGTATATGTTGCTAGCTACAATGATGTTGATAGTCTTGGCAA  
GCTCCTTGTGCAAAAAGGGATACAAAGTGTGCAAGATTGATGGAAGAACAATGAAGAGTGGAGGAACTGAAATAATCACTGAA  
GGTACTTCAGTGAAAAAGCATTTCATAGTCGCAACTAATATTATTGAGAATGGTGTAAACCATTGACATTGATGTAGTTGTGG  
ATTTTGGGACTAAGGTTGTACCAGTTTTGGATGTGGACAATAGAGCGGTGCAGTACAACAAAACCTGTGGTGAGTTATGGGGA  
GCGCATCCAAAGACTCGGTAGAGTTGGGCGACACAAGGAAGGAGTAGCACTTCGAATTGGCCAAACAAATAAAACACTGGTT  
GAAATTCAGAAATGGTTGCCACTGAAGCTGCCTTTCTATGCTTCATGTACAATTTGCCAGTGACAACACAGAGTGTTTTCAA  
CCACACTGCTGGAAAAATGCCACATTATTACAAGCTAGAACTATGGCACAGTTTGAGCTATCATATTTTTTACACAATTAATTT  
TGTGCGATTTGATGGTAGTATGCATCCAGTCATACATGACAAGCTGAAGCGCTTTAAGCTACACACTTGTGAGACATTCCTC  
AATAAGTTGGCGATCCCAATAAAGGCTTATCCTCTTGGCTTACGAGTGGAGAGTATAAGCGACTTGGTTACATAGCAGAGG  
ATGCTGGCATAAGAATCCCATTCGTGTGCAAAGAAATTCAGACTCCTTGCATGAGGAAATTTGGCACATTGTAGTCGCCCCA  
TAAAGGTGACTCGGGTATTGGGAGGCTCACTAGCGTACAGGCAGCAAAGGTTGTTTATACTCTGCAAACGGATGTGCACTCA  
ATTGCGAGGACTCTAGCATGCATCAATAGACTCATAGCACATGAACAAATGAAGCAGAGTCATTTTGAAGCCGCAACTGGGA  
GAGCATTTTCTTTCACAAATTACTCAATACAAAGCATATTTGACACGCTGAAAGCAAATTTAGTCAAAAGCATACGAAAGA  
AAATATTGCAGTGCTTCAGCAGGCAAAAAGATCAATTGCTAGAGTTTTCGAACCTTAGCAAAGGATCAAGATGTCACGGGTATC  
ATCCAAGACTTCAATCACCTGGAAACTATCTATCTCCAATCAGATAGCGAAGTGGCTAAGCATCTGAAGCTTAAAAGTCACT  
GGAATAAAAAGCCAAATCACTAGGGACATCATAATAGCTTTGTCTGTGTTAATTGGTGGTGGATGGATGCTTGAACGTA  
CAAGGACAAGTTCAATGAACCACTTATTTCCAAGGGAAGAAGAATCAGAAGCACAAGCTTAAGATGAGAGAGGCGCGTGGG  
GCTAGAGGGCAATATGAGGTTGCAGCGGAGCCAGAGGCGCTAGAACATTACTTTGGAAGCGCATATAATAACAAAGGAAAGC  
GCAAGGGCACCACGAGAGGAATGGGTGCAAAGTCTCGGAAATTCATAAACATGTATGGGTTTGATCCAACCTGATTTTTT  
CATA  
CATTAGGTTTGTGGATCCATTGACAGGTCACACTATTGATGAGTCCACAAACGCACCTATTGATTTAGTGCAGCATGAGTTT  
GGAAAGGTTAGAACACGCATGTTAATTGACGATGAGATAGAGCCTCAAAGTCTTAGCACCCACACCACAATCCATGCTTATT  
TGGTGAATAGTGGCACGAAGAAAGTTCTTAAAGGTTGATTTAACACCACACTCGTCGCTACGTGCGAGTGAGAAATCAACAGC  
AATAATGGGATTTCTTGAAGGGGAGAATGAATTGCGTCAAACCGGCATGGCAGTGCCAGTGGCTTATGATCAATTGCCACCA  
AAGAGTGAGGACTTGACGTTTGAAGGAGAAAGCTTGTTTTAAGGGACCACGTGATTACAACCCGATATCGAGCACCATTGTG  
CTACTTGACGAATGAATCTGATGGGCACACAACATCGTTGTATGGTATTGGATTGGTCCCTTCATCATTACAAACAAGCACTT  
GTTTAGAAGAAAATAATGGAACACTGTTGGTCCAATCACTACATGGTGTATTCAAGGTCAAGAACACCACGACTTTGCAACAA  
CACCTCATTGATGGGAGGGACATGATAATTATTCGCATGCCTAAGGATTTCCCACCATTTCTCCTCAAAGCTGAAATTTAGAG  
AGCCACAAAGGGAAGAGCGCATATGTCTTGTGACAACCAACTTCCAACTAAGAGCATGTCTAGCATGGTGTGACACACTAG  
TTGCACATTCCCTTCATCTGATGGCATAATTCTGGAAGCATTGGATTCAAACCAAGGATGGGCAGTGTGGCAGTCCATTAGTA  
TCAACTAGAGATGGGTTCAATTGTTGGTATACACTCAGCATCGAATTTCAACCAACACAAACAATTTATTTACAAAGCGTGCCGA  
AAAACCTCATGAATTTGTTGACAAATCAGGAGGCGCAGCAGTGGGTTAGTGGTGGCGATTAAATGCTGACTCAGTATTTGTG  
GGGGGGCCATAAAGTTTTCATGAGCAAACCTGAAGAGCCTTTTACGCCAGTTAAGGAAGCGCACTCACTCATGAGTGAATTG  
GTGTACTCGCAAGGGGAGAAAGGAAATGGGTCTGGAAGCACTGTGAGGGAACCTGAGGCCAGTGGCTGAGTGTCCAGTCT  
AGTTAGTCACAAAGCATGTGGTTAAAGGAAAGTGTCCCTCTTTGAGCTCTACTTGCAGTTGAATCCAGAAAAGGAAGCATA  
TTTTAAACCGATGATGGGAGCATATAAGCCAAGTCGACTTAATAGAGAGGCGTTCTCCTCAAGGACATTTCTAAAATATGCTAGT  
GAAATTGAGATTGGGAATGTGGATTGTGACTTGCTGGAGCTTGCAATAAGCATGCTCATCACAAAGCTCAAGGCGTTAGGAT  
TCCCAACTGTGAACTACATCACTGACCCAGAGGAAATTTTTAGTGCATTGAATATGAAAGCAGCTATGGGAGCACTATACAA  
AGGCAAGAAGAAAGAGCTCTCAGCGAGCTCACACTAGATGAGCAGGAGGCAATGCTCAAAGCAAGTTGCCTGCGACTGTAT  
ACGGGAAAGCTGGGAATTTGGAATGGCTCATTGAAAGCAGAGTTGCGTCCAATTGAGAAGGTTGAAAACAACAAAACGCGAA  
CTTTACAGCAGCACCAATAGACACTCTTCTTGTGGTAAAGTTTGCCTGGATGATTTCAACAATCAATTTTATGATCTCAA  
CATAAAGGCACCATGGACAGTTGGTATGACTAAGTTTTATCAGGGGTGGAATGAATTGATGGAGGCTTTACCAAGTGGGTGG  
GTGTATTGTGACGCTGATGGTTCGCAATTCGACAGTTCCTTGACTCCATTTCCTCATTAATGCTGTATTGAAAGTGCAGCTTG  
CCTTCATGGAGGAATGGGATATTGGTGAGCAAATGCTGCGAAATTTGTACACTGAGATAGTGTATACACCAATCCTCACACC  
GGATGGTACTATCATTAAGAAGCATAAAGGCAACAATAGCGGGCAACCTTCAACAGTGGTGGACAACACACTCATGGTCATT  
ATTGCAATGTTATACACATGTGAGAAGTGTGGAATCAACAAGGAAGAGATTGTGTATTACGTCAATGGCGATGACCTATTGA  
TTGCCATTCACCAGATAAAGCTGAGAGGTTGAGTGGATTCAAAGAATCTTTCCGAGAGTTGGGCCTGAAATATGAATTTGA  
CTGCAACCAAGGACAGACAGATTGTGGTTCATGTACACAGGGCTTTGGAGAGGGATGGCATGTATATACCAAAGCTA  
GAAGAAGAAAGGATTTCTATTTTGGAAATGGGACAGATCCAAAGAGCCGTCACATAGGCTTGAAGCCATCTGTGCATCAA  
TGATCGAAGCATGGGTTATGACAAGCTGGTTGGAAGAAATCCGCAATTTCTATGCATGGGTTTTTGAACAAGCGCCGTATTC  
ACAGCTTGCAAGAAGGAAAGGCGCCATATCTGGCTGAGACTGCGCTTAAAGTTTTTGTACACATCTCAGCACGGAACAAAC  
TCTGAGATAGAAGAGTATTTAAAAGTGTTGTATGATTACGATATTTCAACGACTGAGAATCTTTATTTTTCAGTCAAGGTACAA  
TGGA AAAAGAAATTGTCGTGGAGTGAGAAAAGGTACTTGGACCAAAGAAGAAGACACTCTCTTGAGGCAATGTATAGAAGAGTA  
TGGTGAAGGGAAATGGCATCAAGTTCCACACAGAGCAGGGTTGAACCGGTGTAGGAAGAGTTGCAGGCTGAGGTGGTTGAAT  
TATCTGAGGCCAAATATCAAAAAGAGGTCGGTTTTTCGAGAGATGAAGTGGACCTAATTGTGAGGCTTCATAAGCTGTTGGGTA  
ACAAATGGTCGCTGATTGCTGGTAGAATTCCTGGAAGGACAGCTAATGACGTGAAGAACTTTTGAATACTCATGTGGGGAA  
GAATTTAGGCGAGGATGGAGAACGATGCCGGA AAAATGTTATGAACACAAAAACCATTAAGCTGACTAATATCGTAAGACCC  
CGAGCTCGGACCTTCACCGATTGCACGTTACTTGGCCGAGAGAAGTCGGAAAAACCGATGAATTTTCAAATGTCCGGTTAA  
CAACTGATGAGATTCCAGATTGTGAGAAGCAAACGCAATTTTACAATGATGTTGCGTCGCCACAAGATGAAGTTGAAGACTG  
CATTCACTGGTGGAGTAAGTTGCTAGAAACAACGGAGGATGGGGAATTAGGAAACCTATTTCGAGGAGGCCCAACAAATTGGA  
AATACTACAGAGAACCTCTACTTTCAAAGTGGCACTGTGGGTGCTGGTGTGACGCTGGTAAGAAGAAAGATCAAAAGGATG

ATAAAGTCGCTGAGCAGGCTTCAAAGGATAGGGATGTTAATGCTGGAAC TTCAGGAACATTCTCAGTTCCACGAATAAATGCTATG GCCACAAAACTTCAATATCCAAGGATGAGGGGAGAGGTGGTTGTAAAC TTGAATCACCTTTTAGGATACAAGCCACAGCAAATTGATTTGTCAAATGCTCGAGCCACACATGAGCAGTTTGCCGCGTGGCATCAGGCAGTGATGACAGCCTATGGAGTGAATGAAGAGCAAATGAAAAATATTGCTAAATGGATTTATGGTGTGGTGCATAGAAAATGGGACTTCCCCAAATTTGAACGGAAC TTGGGTTATGATGGATGGTGAGGAGCAAGTTTCATACCCGCTGAAACCAATGGTTGAAAACGCGCAGCCAACACTGAGGCAAATTATGACACACTTCAGTGACCTGGCTGAAGCGTATATTGAGATGAGGAATAGGGAGCGACCATACATGCCTAGGTATGGTCTACAGAGAAACATTACAGACATGAGTTTGTACGCTATGCGTTCGACTTCTATGAGCTAACTTCAAAAACACCTGTTAGAGC GAGGGAGGCGCATATGCAAATGAAAGCTGCTGCAGTACGAAACAGTGGAAC TAGGTTATTTGGTCTTGATGGCAACGTGGGTACTGCAGAGGAAGACACTGAACGGCACACAGCGCACGATGTGAACCGTAACATGCACACACTATTAGGGGTCCGCCAGTGATAGTTTCTGCGTGTCTTTGCTTTCCGCTTTTAAAGCTTATTGTAATATATATGAATAGCTATTACAGTGGGACTTGGTCTTGT GTTGAATGGTATCTTATATGTTTTAATATGTCTTATTAGTCTCATTACTTAGGCGAACGACAAAAGTGAGGTCACCTCGGTCTAATTCTCCTATGTAGTGCGAGAAAAA

>TEV-eGFP

GAAAATAACAAATCTCAACACAACATATACAAAACAAACGAATCTCAAGCAATCAAGCATTCTACTTCTATTGCAGCAATTTAAATCATTTCTTTTAAAGCAAAAGCAATTTTCTGAAAATTTTACCATTACGAACGATAGCCATGGCACTCATCTTTGGCA CAGTCAACGCTAACATCCTGAAGGAAGTGTTCGGTGGAGCTCGTATGGCTTGCGTTACCAGCGCACATATGGCTGGAGCGAA TGGAAAGCATTTTGAAGAAGGCAGAAAGAACCTCTCGTGCAATCATGCACAAACCAGTGATCTTCGGAGAAGACTACATTACC GAGGCAGACTTGCCTTACACACCACTCCATTTAGAGGTGCGATGCTGAAATGGAGCGGATGTATTATCTTGGTCTGTCGCGCGC TCACCCATGGCAAGAGACGCAAAAGTTTCTGTGAATAACAAGAGGAACAGGAGAAGGAAAGTGGCCAAAACGTACGTGGGGCG TGATTCCATTGTTGAGAAGATTGTAGTGCCCCACACCGAGAGAAAGGTTGATACCACAGCAGCAGTGGAAGACATTTGCAAT GAAGCTACCACTCAACTTGTGCATAATAGTATGCCAAAGCGTAAGAAGCAGAAAAACTTCTTGCCCGCCACTTCACTAAGTA ACGTGATGCCCCAACTTGGAGCATAGTGCGCAAACGCCATATGCAGGTGGAGATCATTAGCAAGAAGAGCGTCCGAGCGAG GGTCAAGAGATTTGAGGGCTCGGTGCAATTGTTGCAAGTGTGCGTCACATGTATGGCGAGAGGAAAAGGTGGACTTACGT ATTGACAACCTGGCAGCAAGAGACACTTCTAGACCTTGCTAAAAGATTTAAGAATGAGAGAGTGGAATCAATCGAAGCTCACTT TTGGTTCAAGTGGCCTAGTTTTGAGGCAAGGCTCGTACGGACCTGCGCATTTGGTATCGACATGGTATGTTTATTGTACGCGG TCGGTGCGATGGGATGTTGGTGGATGCTCGTGCGAAGGTAACGTTGCTGTTTGTCACTCAATGACACATTATAGCGACAAA TCAATCTCTGAGGCATTCTTCATACCATACTCTAAGAAATTTCTGGAGTTGAGGCCAGATGGAATCTCCCATGAGTGTACAA GAGGAGTATCAGTTGAGCGGTGCGGTGAGGTGGCTGCAATCCTGACACAAGCACTTTCACCGTGTGGTAAGATCACATGCAA ACGTTGCATGGTTGAAACACCTGACATTGTTGAGGGTGAGTCGGGAGACAGTGTCAACCAACCAAGGTAAGCTCCTAGCAATG CTGAAAGAACAGTATCCAGATTTCCCAATGGCCGAGAACTACTCACAAGGTTTTTGCAACAGAAATCACTAGTAAATACAA ATTTGACAGCCTGCGTGAGCGTCAAACAACCTCATTGGTGACCGCAAACAAGCTCCATTACACACGTAAGTGGCTGTCAGCGA AATTCTGTTTTAAAGCAATAAACTAACAGGGGCCGATCTCGAAGAGGCAAGCACACATATGCTTGAAATAGCAAGGTTCTTG AACAAATCGCACTGAAAAATATGCGCATTTGGCCACCTTGGTTCTTTCAGAAATAAAATCTCATCGAAGGCCCATGTGAATAACG CACTCATGTGTGATAATCAACTTGATCAGAATGGGAATTTTATTTGGGGACTAAGGGGTGCACACGCAAAAGAGGTTTCTTAA AGGATTTTTCTACTGAGATTGACCCAAATGAAGGATACGATAAGTATGTTATCAGGAAACATATCAGGGGTAGCAGAAAGCTA GCAATTGGCAATTTGATAATGTCAACTGACTTCCAGACGCTCAGGCAACAAATTCAGGCGAAACTATTGAGCGTAAAGAAA TTGGGAATCACTGCATTTCAATGCGGAATGGTAATTACGTGTACCCATGTTGTTGTGTACTCTTGAAGATGGTAAGGCTCA ATATTCGGATCTAAAGCATCCAACGAAGAGACATCTGGTCATTGGCACTCTGGCGATTCAAAGTACCTAGACCTTCCAGTT CTCAATGAAGAGAAAAATGTATATAGCTAATGAAGTTATTGCTATGATGAACATTTCTTTGCTCTACTAGTGAATGTCAAGG AAGAGATGCAAAAGGACTTACCAAGTTTATAAGGGACACAATTCGTTCCAAAGCTTGGAGCGTGCCAGTAAACAATGCAAGATGT TGCAACTGCATGCTACTTCTTTCCATTTCTTTACCCAGATGTCTGAGTGTGAATTACCCAGAATTTTGGTTGATCATGAC AACAAAAAATGCATGTTTTGGATTTCGTATGGGTCTAGAACGACAGGATACCACATGTTGAAAATGAACACAACATCCCAGC TAATTGAATTCGTTTCAATTCAGGTTTGGAAATCCGAAATGAAAACCTTACAATGTTGGAGGGATGAACCGAGATATGGTCACACA AAGGTGCAATTGAGATGTTGATCAAGTCCATATACAAACCACATCTCATGAAGCAGTTACTTGGAGGAGGCCATACATAATT GTCTTGCAATAGTCTCCCTTCAATTTTAATTGCCATGTACAACCTTGGAACCTTTTGAGCAGGCGTTACAAATGTGGTTGC CAAATACAATGAGGTTAGCTAACCTCGCTGCCATCTTGTGAGCCTTGCGCGAAAAGTTAACTTTGGCAGACTTGTTTCGTCCA GCAGCGTAATTTGATTAATGAGTATGCGCAGGTAATTTTGGACAATCTGATTGACGGTGTGAGGGTTAACCATTCGCTATCC CTAGCAATGGAATTTGTTACTATTAAGCTGGCCACCCAAGAGATGGACATGGCGTTGAGGGAAGGTGGCTATGCTGTGACCT CTGAAAAGGTGCATGAAATGTTGGAAAAAACTATGTAAAGGCTTTGAAGGATGCATGGGACGAATTAACCTTGGTTGGAAAA ATTCTCCGCAATCAGGCATTCAGGAAAGCTCTTGAAATTTGGGCGAAAGCCTTTAATCATGAAAAACACCGTAGATTGCGGC GGACATATAGACTTGCTGTGAAAATCGCTTTTCAAGTTCCACTTGGAACCTCTGAAGGGAACCATCTCAAGAGCCGTAAATG GTGGTGCAAGAAAGGTAAGAGTAGCGAAGAATGCCATGACAAAAGGGGTTTTTCTCAAAATCTACAGCATGCTTCCTGACGT CTACAAGTTTATCACAGTCTCGAGTGTCCTTTCCCTTGTGTTGACATTCTTATTTCAAATTGACTGCATGATAAGGGCACAC CGAGAGGCGAAGGTTGCTGCACAGTTGCAGAAAGAGAGCGAGTGGGACAATATCATCAATAGAACTTTCAGTATTCTAAGC TTGAAAATCCTATTGGCTATCGCTCTACAGCGGAGGAAAGACTCCAATCAGAACACCCCGAGGCTTTCGAGTACTACAAGTT TTGCATTGGAAGGAAGACCTCGTTGAACAGGCAAAAACCGGAGATAGCATACTTTGAAAAGATTATAGCTTTTCATCACA CTTGTATTAAATGGCTTTTACGCTGAGCGGAGTGATGGAGTGTTCGAAGTACTCAATAAGTTCAAAGGAATACTGAGCTCAA CGGAGAGGAGATCATCTACACGCAAGTTTGGATTGATTACGTTTACAACCTTTGATGACAATATGACAATCAACCTCGAGTT GAATATGGATGAACTCCACAAGACGAGCCTTCTTGAGTCACTTTTAAAGCAATGGTGGAACAACCAATCAGCCGAGGCAAC GTGAAGCCACATTATAGAATGAGGGGCACCTCATGGAGTTTACCAGAGATACTGCGGCATCGGTTGCCAGCGAGATATCAC

ACTCACCCGCAAGAGATTTTCTTGTGAGAGGTGCTGTTGGATCTGGAAAATCCACAGGACTTCCATACCATTTATCAAAGAG  
AGGGAGAGTGTTAATGCTTGAGCCTACCAGACCACTCACAGATAACGTGCACAAGCAACTGAGAAGTGAACCATTTAACTGC  
TTCCCAACTTTGAGGATGAGAGGGAAAGTCAACTTTTGGGTGATCACCATTACAGTCATGACTAGTGGATTTCGCTTTACACC  
ATTTTGCACGAAAACATAGCTGAGGTAAAAACATACGATTTTGTCTATAATTGATGAATGTCATGTGAATGATGCTTCTGCTAT  
AGCGTTTAGGAATCTACTGTTTGAACATGAATTTGAAGGAAAAGTCTCAAAGTGTGAGCCACACCACCAGGTAGAGAAGTT  
GAATTCACAACCTCAGTTTCCCGTGAAACTCAAGATAGAAGAGGCTCTTAGCTTTCAGGAATTTGTAAGTTTACAAGGGACAG  
GTGCCAACGCCGATGTGATTAGTTGTGGCGACAACATACTAGTATATGTTGCTAGCTACAATGATGTTGATAGTCTTGGCAA  
GCTCCTTGTGCAAAAAGGGATACAAAGTGTGCAAGATTGATGGAAGAACAATGAAGAGTGGAGGAAGTGAATAATCACTGAA  
GGTACTTCAGTGAAAAAGCATTTTCATAGTCGCAACTAATATTATTGAGAATGGTGTAAACCATTGACATTGATGTAGTTGTGG  
ATTTTGGGACTAAGGTTGTACCAGTTTGGATGTGGACAATAGAGCGGTGCAGTACAACAAAACCTGTGGTGAGTTATGGGGA  
GCGCATCCAAAAGACTCGGTAGAGTTGGGCGACACAAGGAAGGAGTAGCAGCTTCAATTTGGCCAAAACAAAATAAAACACTGGTT  
GAAATTCAGAAAATGGTTGCCACTGAAGCTGCCTTTCTATGCTTCATGTACAATTTGCCAGTGACAACACAGAGTGTTCAA  
CCCACTGCTGGAAAATGCCACATTATTACAAGCTAGAACTATGGCACAGTTTGAGCTATCATATTTTTACACAATTAATTT  
TGTGCGATTTGATGGTAGTATGCATCCAGTCATACATGACAAGCTGAAGCGCTTAAAGCTACACACTTGTGAGACATTCCTC  
AATAAGTTGGCGATCCCAATAAAGGCTTATCCTCTTGGCTTACGAGTGGAGAGTATAAGCGACTTGGTTACATAGCAGAGG  
ATGCTGGCATAAGAATCCCATTCGTGTGCAAGAAATCCAGACTCCTTGCTAGGAGAAATTTGGCACATTGTAGTCGCCCA  
TAAAGGACTCGGTTATTGGGAGGCTCACTAGCTACAGGCAGCAAAAGTTGTTTATACTCTGCAACCGGATGTGCATCA  
ATTGCGAGGACTCTAGCATGCATCAATAGACTCATAGCACATGAACAATGAAGCAGAGTCATTTTGAAGCCGCAACTGGGA  
GAGCATTTTCTTCACAAATTAATCTCAATACAAAGCATATTTGACACGCTGAAAGCAAATTTATGCTACAAAGCATACGAAAGA  
AAATATTGCAGTGCTTCAGCAGGCAAAAGATCAATTGCTAGAGTTTTCGAACCTAGCAAAGGATCAAGATGTCACGGGTATC  
ATCCAAGACTTCAATCACCTGGAACTATCTATCTCCAATCAGATAGCGAAGTGGCTAAGCATCTGAAGCTTAAAAGTCACT  
GGAATAAAAGCCAAATCACTAGGGACATCATAATAGCTTTGCTGTGTGTTAATTGGTGGTGGATGGATGCTTGCAACGTACTT  
CAAGGACAAGTTCAATGAACCAGTCTATTTCCAAGGAAGAAGAATCAGAAGCACAAGCTTAAAGATGAGAGAGGCGCGTGGG  
GCTAGAGGGCAATATGAGGTTGCAGCGGAGCCAGAGGCGCTAGAACATTACTTTGGAAGCGCATATAATAACAAAGGAAAGC  
GCAAGGGCACCACGAGAGGAATGGGTGCAAAGTCTCGGAAATTCATAAACATGTATGGGTTTGATCCAACGTGATTTTTTCATA  
CATTAGGTTTGTGGATCCATTGACAGGTCACACTATTGATGAGTCCACAAACGCACCTATTGATTTAGTGCAGCATGAGTTT  
GGAAAGGTTAGAACACGCATGTTAATTGACGATGAGATAGAGCCTCAAAGTCTTAGCACCCACACCACAATCCATGCTTATT  
TGGTGAATAGTGGCACGAAGAAAGTTCTTAAAGGTTGATTTAACACCACACTCGTCGCTACGTGCGAGTGAGAAATCAACAGC  
AATAATGGGATTTTCTGAAAAGGGAGAATGAATTGCGTCAAACCGGCATGGCAGTGCCAGTGGCTTATGATCAATTGCCACCA  
AAGAGTGAGGACTTGACGTTTGAAGGAGAAAGCTTGTTTAAAGGGACCAGTGATTAACCCGATATCGAGCACCATTGTGTC  
ACTTGACGAATGAATCTGATGGGCACACAACATCGTTGTATGGTATTGGATTGGTCCCTTCATCATTACAAACAAGCACTT  
GTTTAGAAGAAATAATGGAACACTGTTGGTCCAATCACTACATGGTGTATTCAAGGTCAAGAACACCACGACTTTGCAACAA  
CACCTCATTGATGGGAGGGACATGATAATTATTCGCATGCCTAAGGATTTCCACCATTTCTCAAAGAGTGAAATTTAGAG  
AGCCACAAAGGGAAGAGCGCATATGTCTGTGACAACCAACTTCCAAACAAAGAGCATGTCTAGCATGTGTGTCAGACACTAG  
TTGCACATTCCTTTCATCTGATGGCATATTTCTGGAAGCAATTGGATTCAAACAAAGGATGGGCGAGTGTGGCAGTCCATTAGTA  
TCAACTAGAGATGGGTTTCAATTGTTGGTATACACTCAGCATCGAATTTACCAACACAAACAATTTATTTACAAAGCGTGCCGA  
AAAACCTTCATGGAATTGTTGACAAATCAGGAGGCGCAGCAGTGGGTTAGTGGTTGGCGATTAAATGCTGACTCAGTATTGTG  
GGGGGGCCATAAAAGTTTTCATGAGCAAACCTGAAGAGCCTTTTCAGCCAGTTAAGGAAGCGACTCAACTCATGAGTGAATTG  
GTGTACTCGCAAGGGGAGAAAGAGGAAATGGGTCTGGAAGCACTGTCAGGGAACCTTGAGGCCAGTGGCTGAGTGTCCAGTC  
AGTTAGTCACAAAGCATGTGGTTAAAGGAAAGTGTCCCTCTTTGAGCTCTACTTGCAAGTTGAATCCAGAAAAGGAAGCATA  
TTTTAAACCGATGATGGGAGCATATAAGCCAAGTCGACTTAATAGAGAGGCGTTTCTCAAGGACATTCTAAAATATGCTAGT  
GAAATTGAGATTGGGAATGTGGATTGTGACTTGCTGGAGCTTGCAATAAGCATGCTCATCACAAGCTCAAGGCGTTAGGAT  
TCCCAACTGTGAACATACATCACTGACCCAGAGGAAATTTTTAGTGCATTGAATATGAAAGCAGCTATGGGAGCACTATACAA  
AGGCAAGAAGAAAGAGCTCTCAGCGAGCTCACACTAGATGAGCAGGAGGCAATGCTCAAAGCAAGTTGCCTGCGACTGTAT  
ACGGGAAAGCTGGGAATTTGGAATGGCTCATTGAAAGCAGAGTTGCGTCCAATTGAGAAGGTTGAAAACAACAAAACGCGAA  
CTTTACAGCAGCACCAATAGACACTCTTCTTGTGGTAAAGTTTGGCTGGATGATTTCAACAATCAATTTTATGATCTCAA  
CATAAAGGCACCATGGACAGTTGGTATGACTAAGTTTTATCAGGGGTGGAATGAATTGATGGAGGCTTTACCAAGTGGGTGG  
GTGTATTGTGACGCTGATGGTTTCGCAATTCGACAGTTCTTTGACTCCATTCTCTCATTAATGCTGTATTGAAAGTGCAGCTTG  
CCTTCATGGAGGAATGGGATATTGGTGAGCAAATGCTGCGAAATTTGTACACTGAGATAGTGTATACACCAATCCTCACACC  
GGATGGTACTATCATTAAGAAGCATAAAGGCAACAATAGCGGGCAACCTTCAACAGTGGTGGACAACACACTCATGGTCATT  
ATTGCAATGTTATACACATGTGAGAAGTGTGGAATCAACAAGGAAGATTTGTGTATTACGTCAATGGCGATGACCTATTGA  
TTGCCATTACCCAGATAAAGCTGAGAGGTTGAGTGGATTCAAAGAATCTTTTCGGAGAGTTGGGCTGAAATATGAATTTGA  
CTGCACCACCAGGGACAAGACACAGTTGTGGTTTCATGTGCACACAGGGCTTTGGAGAGGGATGGCATGTATATACCAAAGCTA  
GAAGAAGAAAGGATTGTTTCTATTTTGGAAATGGGACAGATCCAAAGAGCCGTCACATAGGCTTGAAGCCATCTGTGCATCAA  
TGATCGAAGCATGGGGTTATGACAAGCTGGTTGAAGAAATCCGCAATTTCTATGCATGGGTTTTTGAACAAGCGCCGTATTC  
ACAGCTTGCAAGAAGAAAGGAAAGGCGCCATATCTGGCTGAGACTGCGCTTAAAGTTTTTGTACACATCTCAGCACGGAACAAAC  
TCTGAGATAGAAGAGTATTTAAAAGTGTGTATGATTACGATATTTCAACGACTGAGAATCTTTATTTTCAGTCAGGTACAA  
TGGTGAGCAAGGGCGAGGAGCTGTTACCCGGGGTGGTGCCCATCCTGGTCGAGCTGGACGGCGACGTAAACGGCCACAAGTT  
CAGCGTGTCCGGCGAGGGCGAGGGCGATGCCACCTACGGCAAGCTGACCCTGAAGTTTCATCTGCACCACCGGCAAGCTGCC  
GTGCCCTGGCCACCCCTCGTGACCACCTGACCTACGGCGTGCAGTGTCTCAGCCGCTACCCCGACCACATGAAGCAGCACG  
ACTTCTTCAAGTCCGCCATGCCGAAGGCTACGTCCAGGAGCGCACCATCTTCTTCAAGGACGACGGCAACTACAAGACCCG  
CGCCGAGGTGAAGTTTCGAGGGCGACACCCTGGTGAACCGCATCGAGCTGAAGGGCATCGACTTCAAGGAGGACGGCAACATC  
CTGGGGCACAAGCTGGAGTACAACACAACAGCCACAACGCTCTATATCATGGCCGACAAGCAGAAGAAGCGCATCAAGGTGA

ACTTCAAGATCCGCCACAACATCGAGGACGGCAGCGTGCAGCTCGCCGACCCTACCAGCAGAACACCCCATCGGCGACGG  
CCCCGTGCTGCTGCCCCGACAACCACTACCTGAGCACCCAGTCCGCCCTGAGCAAAGACCCCAACGAGAAGCGCGATCACATG  
GTCCTGCTGGAGTTCGTGACCGCCGCCGGGATCACTCTCGGCATGGACGAGCTGTACAAGACTACAGAGAACCTCTACTTTC  
AAAGTGGCACTGTGGGTGCTGGTGTTGACGCTGGTAAGAAGAAAAGATCAAAAGGATGATAAAGTCGCTGAGCAGGCTTCAAA  
GGATAGGGATGTTAATGCTGGAACCTCAGGAACATTCTCAGTTCACGAATAAATGCTATGGCCACAAAACCTTCAATATCCA  
AGGATGAGGGGAGAGGTGGTTGTAAACTTGAATCACCTTTTAGGATACAAGCCACAGCAAATTGATTTGTCAAATGCTCGAG  
CCACACATGAGCAGTTTGCCGCGTGGCATCAGGCAGTGATGACAGCCTATGGAGTGAATGAAGAGCAAATGAAAATATTGCT  
AAATGGATTTATGGTGTGGTGCATAGAAAATGGGACTTCCCCAAATTTGAACGGAACCTGGGTTATGATGGATGGTGAGGAG  
CAAGTTTCATACCCGCTGAAACCAATGGTTGAAAACGCGCAGCCAACACTGAGGCAAATTATGACACACTTCAGTGACCTGG  
CTGAAGCGTATATTGAGATGAGGAATAGGGAGCGACCATACATGCCTAGGTATGGTCTACAGAGAAACATTACAGACATGAG  
TTTGTACGCTATGCGTTCGACTTCTATGAGCTAACTTCAAAAACACCTGTTAGAGCGAGGGAGGCGCATATGCAAATGAAA  
GCTGCTGCAGTACGAAACAGTGGAAC TAGGTTATTTGGTCTTGATGGCAACGTGGGTACTGCAGAGGAAGACACTGAACGGC  
ACACAGCGCACGATGTGAACCGTAACATGCACACACTATTAGGGGTCCGCCAGTGATAGTTTCTGCGTGTCTTTGCTTTCCG  
CTTTTAAGCTTATTGTAATATATATGAATAGCTATTCACAGTGGGACTTGGTCTTGTGTTGAATGGTATCTTATATGTTTTA  
ATATGTCTTATTAGTCTCATTACTTAGGCGAACGACAAAAGTGAGGTCACCTCGGTCTAATTCTCCTATGTAGTGCGAGAAAA  
AAAAAAAAAAAAAAAAAAAAAAAAAAAAAAAAAAAAAAAAA
